# Supplementary material for: Evaluation of a Hierarchical Agglomerative Clustering Method Applied to WIBS Laboratory Data for Improved Discrimination of Biological Particles by Comparing Data Preparation Techniques
Source: Copernicus journal article supplement (doi:10.5194/amt-2018-109), 2018-05-07
Supplement: Supplementary file [file amt-2018-109-AC4-supplement.pdf]

1 **Anonymous Referee #3**

2 Received and published: 9 May 2018

3  
4 Note regarding document formatting: black text shows original referee comment, blue text shows  
5 author response, and red text shows quoted manuscript text. Changes to manuscript text are  
6 shown as *italicized and underlined*. Bracketed comment numbers (e.g. [R1.1]) were added for  
7 clarity. All line numbers refer to discussion/review manuscript.

8  
9 [R3.0] This paper describes methods and results which should help improve the interpretation and use of  
10 data obtained with UV-LIF instruments such as the WIBS. The WIBS measures light scattering, a light  
11 scattering asymmetry factor, and fluorescence in three channels. Fielded instruments with data rates that  
12 can exceed hundreds of particles per minute are available. This paper uses a large set of WIBS data  
13 measured for individual materials (Savage et al. 2017) to evaluate different preprocessing procedures for  
14 analysis of such data. Mathematical simulations of externally mixed particles of known composition are  
15 studied. The findings should be useful not only for understanding WIBS data, but more broadly in  
16 applying Hierarchical Agglomerative Clustering to some other problems in aerosol analytical chemistry. I  
17 recommend publication. However, I request that several confusing items be made less confusing.

18  
19 [A3.0] Author response: We thank the referee for her/his positive summary of the manuscript and  
20 recommendation to publish after comments are addressed.

21  
22 [R3.1] The use of the term “synthetic mixtures” (L31-32, L424, 707, L734) is confusing. Chamber studies  
23 with synthetic mixtures of real aerosols and real gases are not uncommon in aerosol science. A google  
24 search of “synthetic mixture” provides discussions of various real “synthetic mixtures.” I only looked at  
25 the first 8 or so items in that search, but I saw none with the meaning used in this paper. The online  
26 dictionaries I saw do not indicate this use of “synthetic” (which as far as I can tell indicates something  
27 about numerical or computational). Synthetic organic chemists make real chemicals. If “synthetic  
28 mixtures” is used for the simulated data investigated here, what terminology is left for researchers to use  
29 when they make real synthetic mixtures of aerosols in a chamber and investigate changes in clusters as  
30 time passes and as particles agglomerate? I do not see how a reader can see from the abstract or even well  
31 into this paper that “synthetic” is being used in this highly non-standard way, and that Savage et al., 2017  
32 did not measure mixtures of particles. The “synthetic mixtures” are actually numerical (or mathematical)  
33 simulations of the WIBS the data that should be obtained for dilute mixtures of particles. Real mixtures of  
34 particles can form agglomerates, and some may agglomerate quickly unless they are sufficiently dilute.

35  
36 [A3.1] This is a good point that we had not previously considered. The same point was raised by  
37 Referee #2 [R2.7, R.2.8, and R2.9]. We removed all use of the term “synthetic mixtures” and  
38 changed most instances of the term to “simulated mixtures.” Note that this comment also impacts  
39 comments [R3.3] and [R3.6].

40  
41 [R3.2] L 20-22 (Abstract). “Here we show for the first time a systematic application of HAC to a  
42 comprehensive set of laboratory data collected using the wideband integrated bioaerosol sensor (WIBS-  
43 4A) (Savage et al., 2017).” Suggest change to: “Here we show for the first time a systematic application  
44 of HAC to a comprehensive set of laboratory data collected for individual particle types using the  
45 wideband integrated bioaerosol sensor (WIBS-4A) (Savage et al., 2017). Here the WIBS data for single-  
46 composition aerosols is combined numerically to generate data to simulate WIBS values for mixtures of  
47 aerosol.”

48  
49 [A3.2] The text of the abstract was modified as suggested.

51 [R3.3] L31-32 (Abstract): “Lastly, six synthetic mixtures of four to seven components were analyzed.”  
52 Might be changed to: “Numerical simulations of mixtures of four to seven components were HAC  
53 analyzed.”

54  
55 [A3.3] The text of the abstract was changed as requested to:  
56 “Lastly, six *numerical simulations of synthetic* mixtures of four to seven components were  
57 analyzed *using HAC*.”  
58

59 [R3.4] L424: “Investigating cluster ability to separate complex synthetic mixtures” Might be changed to:  
60 Investigating the capability to separate particles in simulations of complex synthetic mixtures

61  
62 [A3.4] The sub-title was changed along the suggested lines to:  
63 “Investigating *the capability* ~~cluster ability~~ to separate *particles in simulations of complex*  
64 ~~synthetic mixtures~~”  
65

66 [R3.5] L426-429: “To better simulate real-world scenarios, we analytically synthesized six mixtures of  
67 particles by pooling existing data from selected particle types in prescribed ratios. Each mixture was  
68 synthesized to roughly represent a different hypothetical mixture of particles that might be expected.”  
69 “Analytically” suggests equations or functions were used in obtaining the data for the mixtures. Isn’t  
70 “numerically” or “computationally” what is meant?

71  
72 [A3.5] The word “analytically” was changed to “computationally.”  
73

74 [R3.6] L426-429 might be changed to: “To better simulate real-world scenarios, we numerically  
75 simulated six mixtures of particles by pooling existing WIBS data from selected particle types in  
76 prescribed ratios. Each simulated mixture was assembled to roughly represent a different hypothetical  
77 mixture of particles that might be expected. Also, the particles in each simulated mixture are assumed to  
78 be so dilute that any agglomeration is negligible.” Also, a significant fraction of readers read the abstract  
79 and then look at the figures to see what the results will be. Adding clarifying words to the figure captions  
80 and tables would be useful.

81  
82 [A3.6] These are good suggestions that add clarity to the text. The section was re-written with the  
83 suggested text. Words “computational” or “numerical” added to captions of several figures and  
84 tables to increase clarity, as suggested.  
85

86 [R3.7] [a] I don’t know what “normalized to particle size” means here. Please clarify, possibly with an  
87 equation. Please also give the ranges of error in particle sizes expected. [b] Why is scenario D worse than  
88 B? I think it is because D adds noise to the FL signals, making them less informative by decreasing the  
89 S/N. This added noise occurs in the elastic scattering measurements, and also results from the  
90 approximations used in estimating solutions to the inverse problem for size (with unknown shape,  
91 orientation and refractive index). If the scattering measurement and the solution to the inverse problem  
92 were perfect, then D and B should give very similar results, at least for spherical particles and some  
93 methods of normalizing to particle size and shape. It may be useful to cite a paper or data with WIBS  
94 measurements of size and fluorescence for uniformly-sized fluorescent PSL. For a single size of PSL, do  
95 plots of the WIBS-measured scattering and fluorescence fall on a line or are they spread more randomly?  
96 Even for a spherical PSL particle, with known refractive index, would you suspect that the noise is large  
97 enough to make D less useful than B?

98  
99 [A3.7] To clarify the first question [a], additional text was added to L207:  
100 “...fluorescence intensity was normalized to particle size (*by dividing fluorescence intensity value*  
101 *by light scattering signal when a particle interacts with the diode laser beam*) in order to ...”

102  
103 With respect to the second question [b], the referee is likely correct that results for Scenario D  
104 (fluorescence normalized) are worse than for Scenario B (fluorescence not normalized), because  
105 for Scenario D additional uncertainty with respect to size is propagated into the intensity value.  
106 Normalizing in this way would also propagate uncertainty for field measurements, and so given  
107 the poorer results of the tests analyses represented here we chose not to further explore  
108 parameters represented by Scenario D.  
109

110 [R3.8] Can the authors say anything about the length of times bacteria or fungal spores might last in an  
111 urban environment before a significant fraction of the bioparticles combine with soot, and how that might  
112 affect the usefulness of the WIBS? I'll be very interested to see the results when (sometime in the future)  
113 the authors inject bacteria or fungal spores into a chamber, add soot particles, use the WIBS to sample  
114 with time, and then repeat the some of the analyses in this paper with the results given as a function of  
115 time.  
116

117 [A3.8] This an interesting question, but we do not have a good answer to the hypothetical thought  
118 about atmospheric lifetimes of these particles at this point. It would be great to explore external  
119 mixing of different particles types in the future in order to see how these mixtures could further  
120 influence fluorescence and particle size properties observed by instruments like the WIBS. This is  
121 beyond the scope of the experimental process for now.  
122

123 [R3.9] L23: In abstract: "ratio" of what? In the text, "ratio" first appears in "distance ratio." Suggest  
124 change first use of "ratio" in abstract to "ratio of particle concentrations."  
125

126 [A3.9] Text edited as requested.  
127

128 [R3.10] L117: please add wavelength ranges of FL1 to FL3. Aim for a little broader set of readers.  
129

130 [A3.10] This was also requested by Referee #1. Additional text was added, as shown here:  
131 "The WIBS collects 3 channels of fluorescence intensity information (FL1, FL2, and FL3),  
132 particle size, and particle asymmetry for each interrogated particle. The bands of excitation and  
133 fluorescence emission are: FL1 ( $\lambda_{ex} = 280 \text{ nm}$ ,  $\lambda_{em} = 310 - 400 \text{ nm}$ ), FL2 ( $\lambda_{ex} = 280 \text{ nm}$ ,  $\lambda_{em} = 420$   
134  $- 650 \text{ nm}$ ), and FL3 ( $\lambda_{ex} = 370 \text{ nm}$ ,  $\lambda_{em} = 420 - 650 \text{ nm}$ )."  
135

136 [R3.11] L171: replace "will be" with "were".  
137

138 [A3.11] The phrase "will be" changed to "is" to match correct tense.  
139

140 [R3.12] L199: Suggest change to: Ambient particle number vs size distributions can often be well  
141 approximated by lognormal distributions (citation), although specific subsets of particles, such as  
142 bacteria, pollens or fungal spores, may not exhibit lognormal distributions.  
143

144 [A3.12] Text revised as suggested.  
145

146 [R3.13] L245: "placed into a conceptual pool"? How about, "A subset of the particles were selected  
147 randomly for analysis"?"  
148

149 [A3.13] Text was changed, as suggested, to:  
150 "For each trial, a subset given number of particles from each material type was selected randomly  
151 for HAC analysis placed into a conceptual pool before running through the algorithm to organize  
152 clusters."  
153

153  
154 [R3.14] L258-259: “diesel soot particles . . . commonly observed . . .” Is this referring to WIBS  
155 measurements? Please provide a citation(s).

156  
157 [A3.14] The text as originally written was indeed over-stated and confusing. The text has been  
158 revised to the following:

159 “The first two trials include diesel soot particles, because *light-absorbing carbon aerosol* they are  
160 commonly observed in ~~almost all~~ *aerosol* atmospheric samples with ~~even minimal~~ anthropogenic  
161 influence (*Bond et al., 2013*)...”

162  
163 [R3.15] L299-300: Do you mean: “In each case the input particles are a random subset . . .”

164  
165 [A3.15] Yes, the words “number of” was inserted incorrectly here and the typo was corrected as  
166 suggested by the referee.
